# Supplementary figures and images for: A chemiluminescence-based heterogeneous asymmetric recombinase polymerase amplification assay for the molecular detection of mycotoxin producers
Source: Royal Society of Chemistry journal article supplement (doi:10.1039/d0an02000a), 2020-12-08

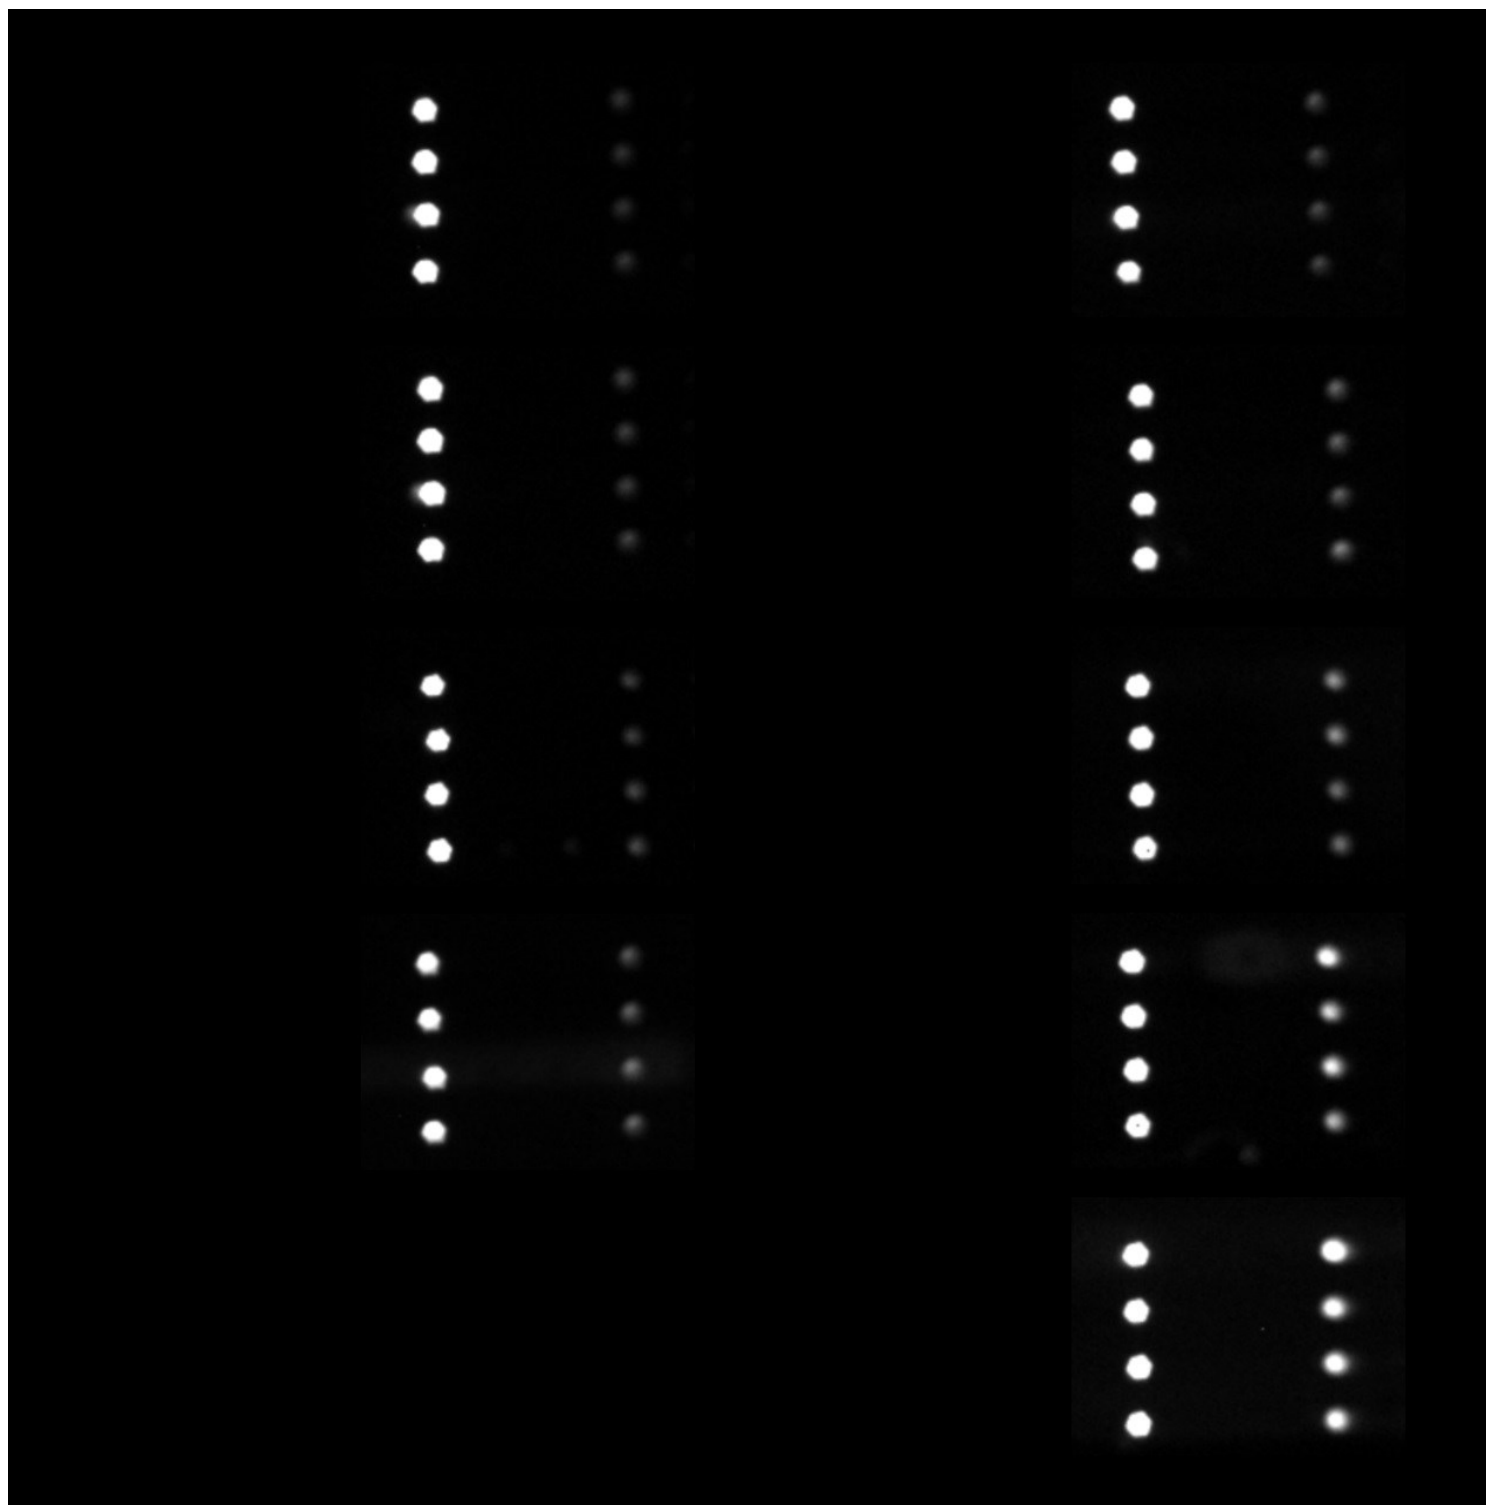

Supplement: d0an02000a4.pdf [file d0an02000a4.pdf]
